# Supplementary material
Source: Research Square preprint supplement (doi:10.21203/rs.3.rs-8328471/v1)
Supplement: Supplementary file 1 [file 5d87f7aedf9e29dd218bf2a9.docx]

Support information for:

**Optimising Viscoelastic Window in Reversible Liquid Crystal Elastomer-Based Pressure Sensitive Adhesives via Chain-Transfer**

Lichang Lu a, Kailing Lin a, Mohand O Saed a*

a Cavendish Laboratory, University of Cambridge, J.J. Thomson Avenue, Cambridge CB3 0HE, U.K.

***Table S1*** *Detailed rubbery modulus and crosslink density for various formulations*

| Formulation | E’ at 100 °C (MPa) | (mol cm−3) |
| --- | --- | --- |
| 1:1 | 1.69 | 1.81×10−4 |
| 1:1.5 | 0.95 | 1.02×10−4 |
| 1:2 | 0.023 | 2.47×10−6 |

***Table S2*** *Characteristic temperatures of LCE adhesives with various formulations*

| Formulation | *Tg* (measured by DSC) | *Tg* (measured by DMA) | *Tni* (°C) |
| --- | --- | --- | --- |
| 1:1 | 0.59 | 3.97 | 51.67 |
| 1:1.5 | -11.57 | -3.10 | 34.80 |
| 1:2 | -19.80 | -10.95 | 23.49 |


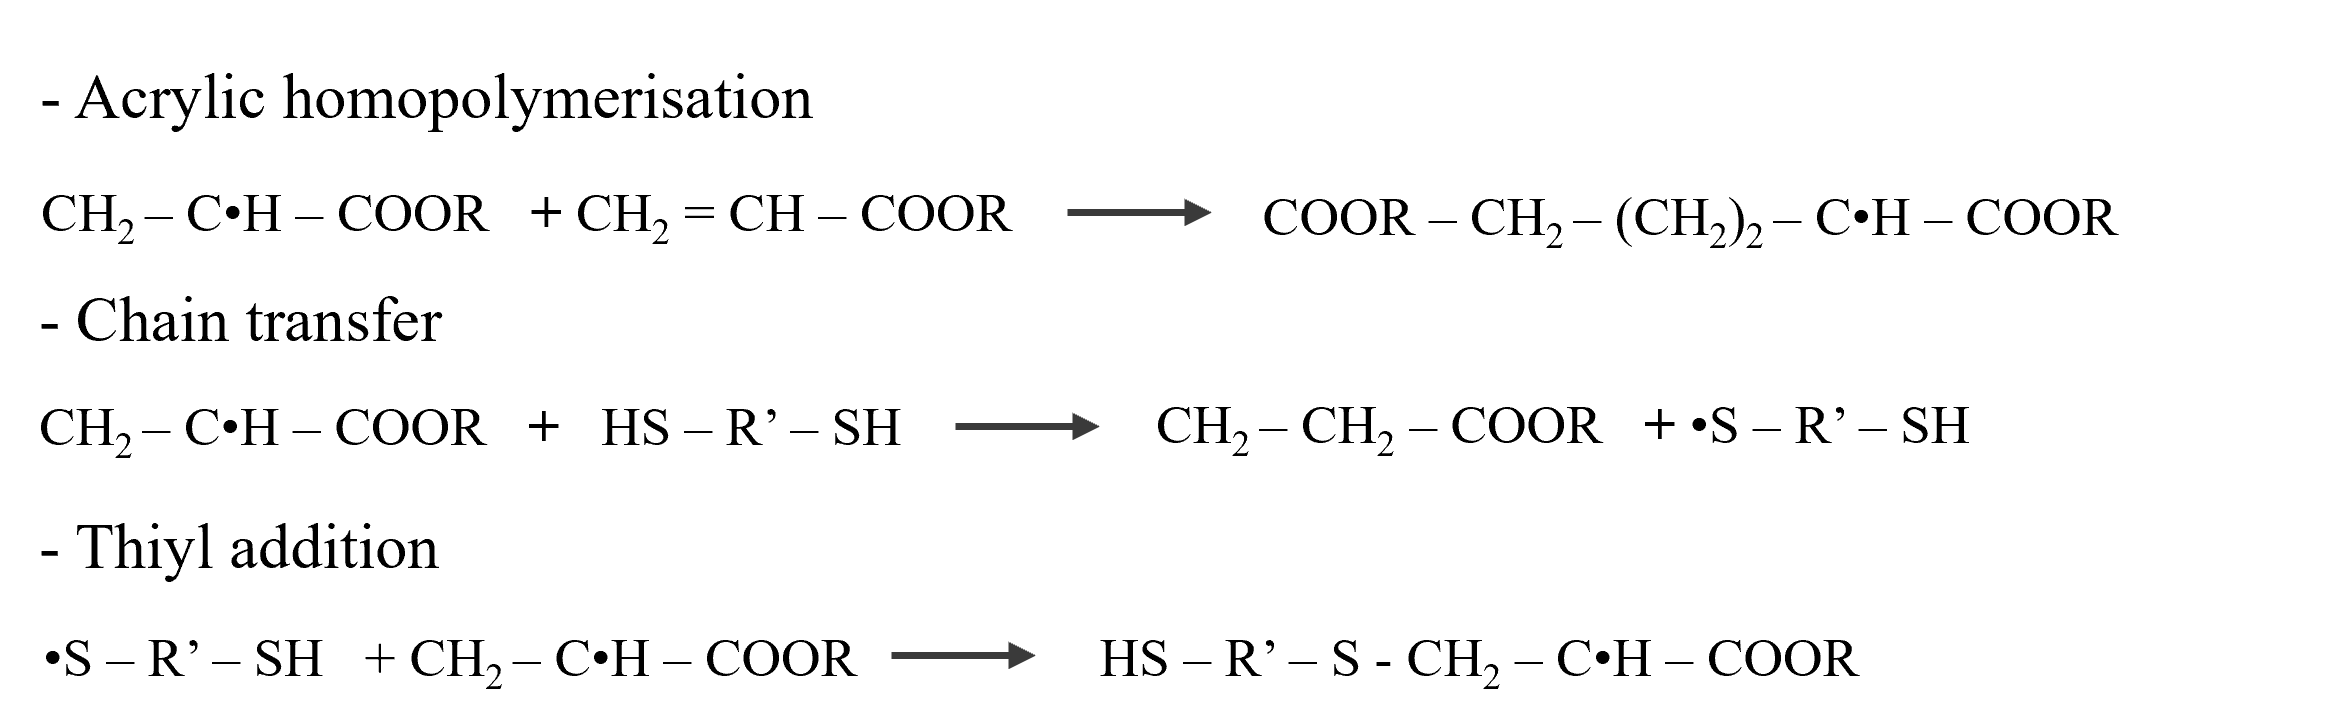


***Figure S1*** *The working principle of the chain transfer reaction*


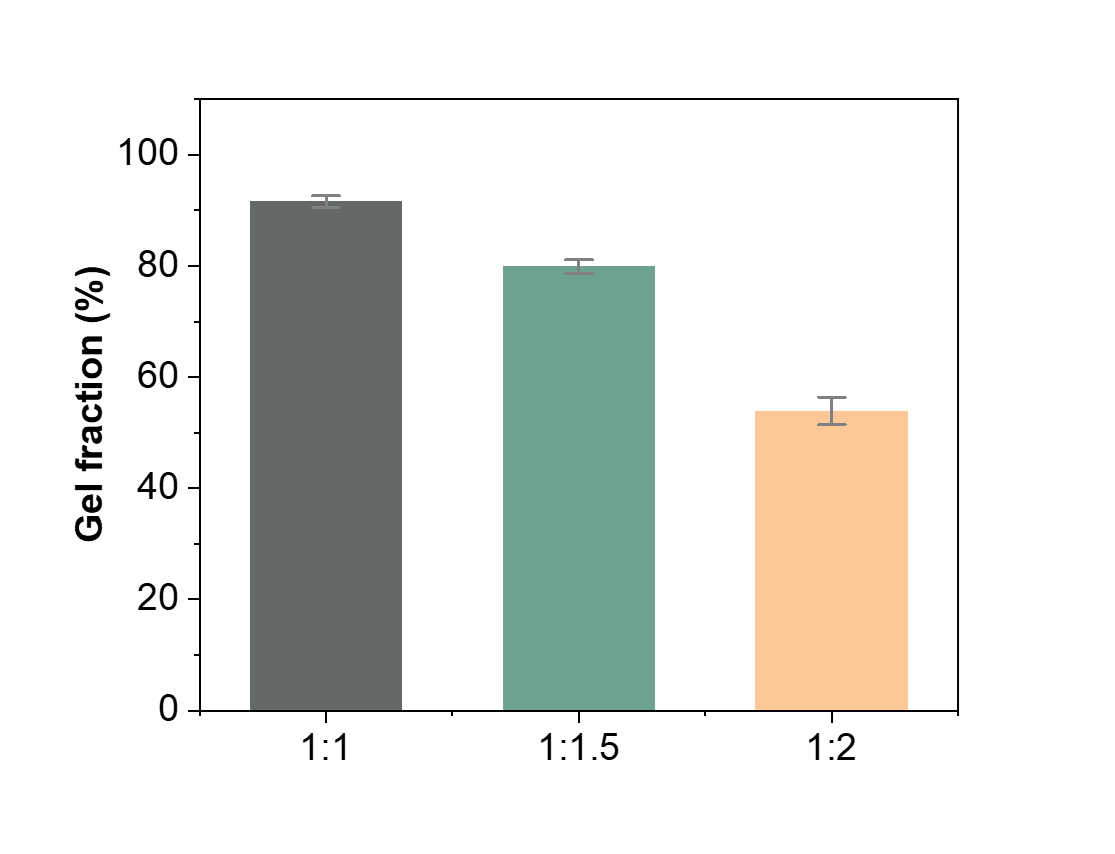


***Figure S2*** *Gel fraction of each LCE formulation*


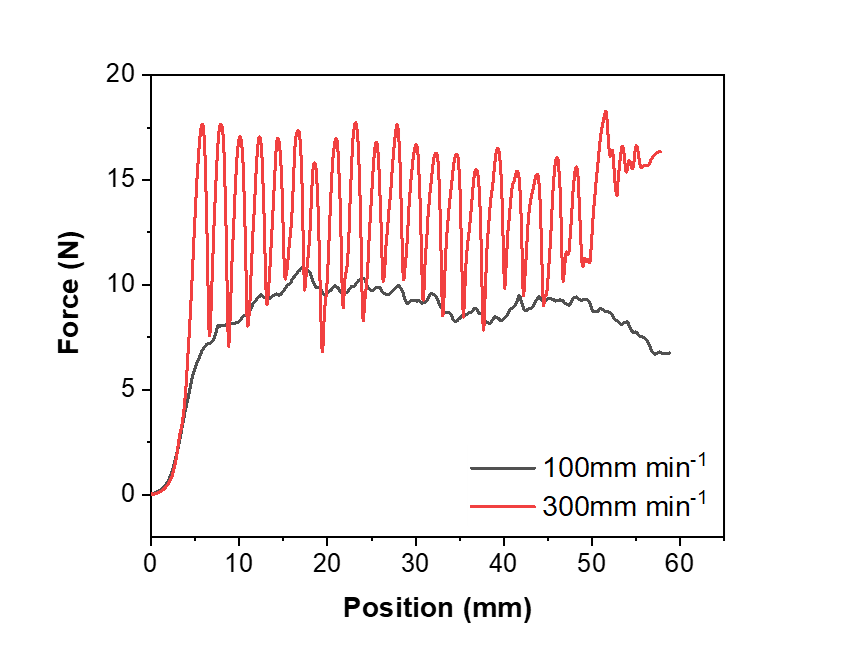


***Figure S3*** *Comparison of the peel force – displacement curves of the LCE adhesive at slow (100 mm min-1) and fast (300 mm min-1) peeling rate*


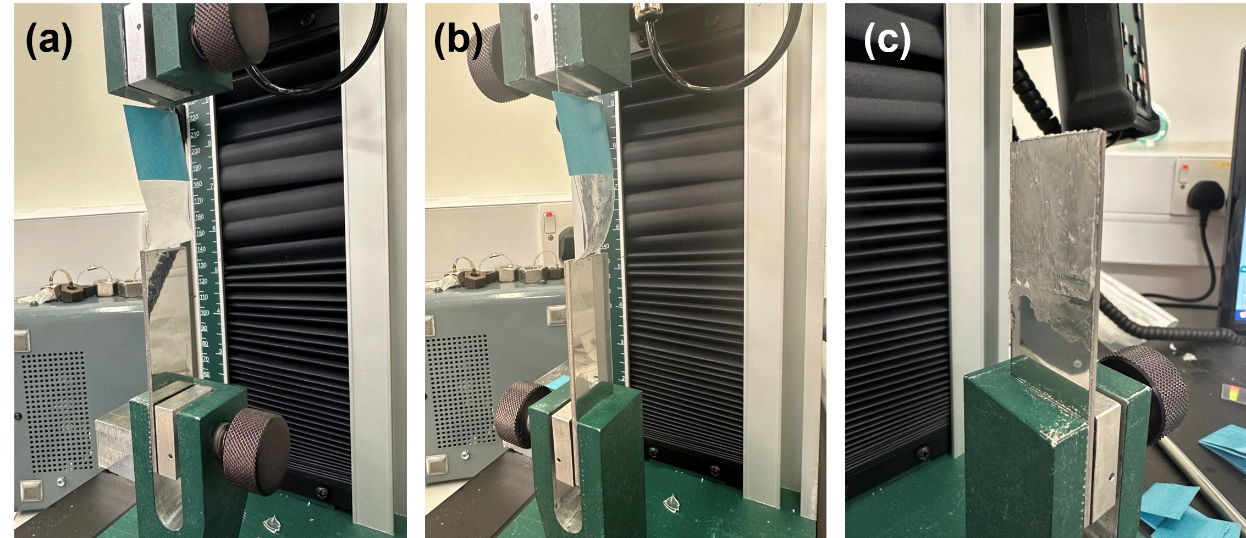


***Figure S4*** *Representative failure modes of the LCE adhesives: (a) adhesive failure at room temperature, (b) adhesive failure at elevated temperature, and (c) cohesive failure.*
